# Supplementary material for: Evaluation of Mucosal Damage and Recovery in the Gastrointestinal Tract of Rats by a Penetration Enhancer
Source: Springer Nature journal article supplement (doi:10.1007/s11095-007-9509-8), 2007-12-26
Supplement: MOESM1 [file 11095_2007_9509_MOESM1_ESM.doc]

##### Appendix A

**Matlab program used to estimate Ka for phenol red +1% SDS**

clear; % PK22.m

n = 300; % Number of steps

kao = 0.009; % ka in min-1

ke = 0.0245; % k in min-1

K23 = 0.0138; % K23 in min-1

K32 = 0.01; % K32 in min-1

dt = 300/n; % Let experiment run for 300 min and calculate dt from 300 min.

for i = 1:n % Initialize arrays;

t(i) = 0;

kaa(i) = 0;

Acc(i) = 0;

Atc(i) = 0;

Aac(i) = 0;

Ace(i) = 0;

Ate(i) = 0;

Aae(i) = 0;

end;

Fc = 0.015; % Bioavailability of control.

Fe = 0.035; % Bioavailability of experiment.

V2=25;

Aac(1) = Fc*6000; % Initial control amount at absorption site = 6000 mcg

Acc(1) = 0; % Initial control amount in central compartment = 0 mcg.

Atc(1) = 0; % Intial control amount in tissue compartment = 0 mcg.

Aae(1) = Fe*6000; % Initial experiment amount at absorption site = 6000 mcg

Ace(1) = 0; % Initial experiment amount in central compartment = 0 mcg.

Ate(1) = 0; % Intial experiment amount in tissue compartment = 0 mcg.

for i = 1:n-1; % Calculation of Aa (amount at absorption site) and A (amount in body)

t(i+1) = t(i) + dt;

if t(i+1) < 5;

ka = 0.051;

elseif t(i+1) >= 5 & t(i+1) < 10;

ka = .030;

elseif t(i+1) >= 10 & t(i+1) < 30;

ka = 0.02;

elseif t(i+1) >= 30 & t(i+1) < 45;

ka = 0.015;

elseif t(i+1) >= 45 & t(i+1) < 60;

ka = 0.011;

elseif t(i+1) >= 60 & t(i+1) < 300;

ka = kao;

elseif t(i+1) >= 300;

ka = kao;

end;

Aac(i+1) = Aac(i) - kao*Aac(i)*dt;

Acc(i+1) = Acc(i) + (kao*Aac(i) - (ke + K23)*Acc(i) + K32*Atc(i))*dt;

Atc(i+1) = Atc(i) + (K23*Acc(i) - K32*Atc(i))*dt;

Aae(i+1) = Aae(i) - ka*Aae(i)*dt;

Ace(i+1) = Ace(i) + (ka*Aae(i) - (ke + K23)*Ace(i) + K32*Ate(i))*dt;

Ate(i+1) = Ate(i) + (K23*Ace(i) - K32*Ate(i))*dt;

end;

Cc=Acc/V2; %negative control

Ce=Ace/V2; %1%SDS

Ce

plot(t,Cc,t,Ce); % Plot Plasma conc vs t and Plasma conc vs t;

axis([0,300,0,10]);

grid;

xlabel('Time(min)');

ylabel('Amount');

**Matlab program used to estimate Ka for phenol red +1.5% SDS**

clear; % PK22.m

n = 300; % Number of steps

kao = 0.009; % ka in min-1

ke = 0.0245; % k in min-1

K23 = 0.0138; % K23 in min-1

K32 = 0.01; % K32 in min-1

dt = 300/n; % Let experiment run for 300 min and calculate dt from 300 min.

for i = 1:n % Initialize arrays;

t(i) = 0;

kaa(i) = 0;

Acc(i) = 0;

Atc(i) = 0;

Aac(i) = 0;

Ace(i) = 0;

Ate(i) = 0;

Aae(i) = 0;

end;

Fc = 0.015; % Bioavailability of control.

Fe = 0.048; % Bioavailability of experiment.

V2=25;

Aac(1) = Fc*6000; % Initial control amount at absorption site = 6000 mcg

Acc(1) = 0; % Initial control amount in central compartment = 0 mcg.

Atc(1) = 0; % Intial control amount in tissue compartment = 0 mcg.

Aae(1) = Fe*6000; % Initial experiment amount at absorption site = 6000 mcg

Ace(1) = 0; % Initial experiment amount in central compartment = 0 mcg.

Ate(1) = 0; % Intial experiment amount in tissue compartment = 0 mcg.

for i = 1:n-1; % Calculation of Aa (amount at absorption site) and A (amount in body)

t(i+1) = t(i) + dt;

if t(i+1) < 10;

ka = .068;

elseif t(i+1) >= 10 & t(i+1) < 20;

ka = .027;

elseif t(i+1) >= 20 & t(i+1) < 30;

ka = 0.021;

elseif t(i+1) >= 30 & t(i+1) < 60;

ka = .021;

elseif t(i+1) >= 60 & t(i+1) < 120;

ka = .014;

elseif t(i+1) >= 120 & t(i+1) < 300;

ka = kao;

elseif t(i+1) >= 300;

ka = kao;

end;

Aac(i+1) = Aac(i) - kao*Aac(i)*dt;

Acc(i+1) = Acc(i) + (kao*Aac(i) - (ke + K23)*Acc(i) + K32*Atc(i))*dt;

Atc(i+1) = Atc(i) + (K23*Acc(i) - K32*Atc(i))*dt;

Aae(i+1) = Aae(i) - ka*Aae(i)*dt;

Ace(i+1) = Ace(i) + (ka*Aae(i) - (ke + K23)*Ace(i) + K32*Ate(i))*dt;

Ate(i+1) = Ate(i) + (K23*Ace(i) - K32*Ate(i))*dt;

end;

Cc=Acc/V2; %negative control

Ce=Ace/V2; %1.5%SDS

Ce

plot(t,Cc,t,Ce); % Plot Plasma conc vs t and Plasma conc vs t;

axis([0,300,0,10]);

grid;

xlabel('Time(min)');

ylabel('Amount');

**Matlab program used to estimate Ka for phenol red +2% SDS**

clear; % PK22.m

n = 300; % Number of steps

kao = 0.009; % ka in min-1

ke = 0.0245; % k in min-1

K23 = 0.0138; % K23 in min-1

K32 = 0.01; % K32 in min-1

dt = 300/n; % Let experiment run for 300 min and calculate dt from 300 min.

for i = 1:n % Initialize arrays;

t(i) = 0;

kaa(i) = 0;

Acc(i) = 0;

Atc(i) = 0;

Aac(i) = 0;

Ace(i) = 0;

Ate(i) = 0;

Aae(i) = 0;

end;

Fc = 0.015; % Bioavailability of control.

Fe = 0.072; % Bioavailability of experiment.

V2=25;

Aac(1) = Fc*6000; % Initial control amount at absorption site = 6000 mcg

Acc(1) = 0; % Initial control amount in central compartment = 0 mcg.

Atc(1) = 0; % Intial control amount in tissue compartment = 0 mcg.

Aae(1) = Fe*6000; % Initial experiment amount at absorption site = 6000 mcg

Ace(1) = 0; % Initial experiment amount in central compartment = 0 mcg.

Ate(1) = 0; % Intial experiment amount in tissue compartment = 0 mcg.

for i = 1:n-1; % Calculation of Aa (amount at absorption site) and A (amount in body)

t(i+1) = t(i) + dt;

if t(i+1) < 5;

ka = 0.082;

elseif t(i+1) >= 5 & t(i+1) < 10;

ka = .078;

elseif t(i+1) >= 10 & t(i+1) < 20;

ka = 0.04;

elseif t(i+1) >= 20 & t(i+1) < 60;

ka = 0.038;

elseif t(i+1) >= 60 & t(i+1) < 90;

ka = .024;

elseif t(i+1) >= 90 & t(i+1) < 120;

ka = .018;

elseif t(i+1) >= 120 & t(i+1) < 180;

ka = .015;

elseif t(i+1) >= 180 & t(i+1) < 240;

ka = .011;

elseif t(i+1) >= 240 & t(i+1) < 300;

ka = kao

elseif t(i+1) >= 300;

ka = kao;

end;

Aac(i+1) = Aac(i) - kao*Aac(i)*dt;

Acc(i+1) = Acc(i) + (kao*Aac(i) - (ke + K23)*Acc(i) + K32*Atc(i))*dt;

Atc(i+1) = Atc(i) + (K23*Acc(i) - K32*Atc(i))*dt;

Aae(i+1) = Aae(i) - ka*Aae(i)*dt;

Ace(i+1) = Ace(i) + (ka*Aae(i) - (ke + K23)*Ace(i) + K32*Ate(i))*dt;

Ate(i+1) = Ate(i) + (K23*Ace(i) - K32*Ate(i))*dt;

end;

Cc=Acc/V2; %negative control

Ce=Ace/V2; %2%SDS

Ce

plot(t,Cc,t,Ce); % Plot Plasma conc vs t and Plasma conc vs t;

axis([0,300,0,10]);

grid;

xlabel('Time(min)');

ylabel('Amount');

**Matlab program used to estimate Ka for1%SDS-15 min recovery**

clear; % PK22.m

n = 300; % Number of steps

kao = 0.009; % ka in min-1

ke = 0.0245; % k in min-1

K23 = 0.0138; % K23 in min-1

K32 = 0.01; % K32 in min-1

dt = 300/n; % Let experiment run for 300 min and calculate dt from 300 min.

for i = 1:n % Initialize arrays;

t(i) = 0;

kaa(i) = 0;

Acc(i) = 0;

Atc(i) = 0;

Aac(i) = 0;

Ace(i) = 0;

Ate(i) = 0;

Aae(i) = 0;

end;

Fc = 0.015; % Bioavailability of control.

Fe = 0.027; % Bioavailability of experiment.

V2=25;

Aac(1) = Fc*6000; % Initial control amount at absorption site = 6000 mcg

Acc(1) = 0; % Initial control amount in central compartment = 0 mcg.

Atc(1) = 0; % Intial control amount in tissue compartment = 0 mcg.

Aae(1) = Fe*6000; % Initial experiment amount at absorption site = 6000 mcg

Ace(1) = 0; % Initial experiment amount in central compartment = 0 mcg.

Ate(1) = 0; % Intial experiment amount in tissue compartment = 0 mcg.

for i = 1:n-1; % Calculation of Aa (amount at absorption site) and A (amount in body)

t(i+1) = t(i) + dt;

if t(i+1) < 10;

ka = 0.025;

elseif t(i+1) >= 10 & t(i+1) < 20;

ka = .027;

elseif t(i+1) >= 20 & t(i+1) < 30;

ka = .017;

elseif t(i+1) >= 30 & t(i+1) < 45;

ka = 0.015;

elseif t(i+1) >= 45 & t(i+1) < 60;

ka = kao;

elseif t(i+1) >= 60 & t(i+1) < 300;

ka = kao;

elseif t(i+1) >= 300;

ka = kao;

end;

Aac(i+1) = Aac(i) - kao*Aac(i)*dt;

Acc(i+1) = Acc(i) + (kao*Aac(i) - (ke + K23)*Acc(i) + K32*Atc(i))*dt;

Atc(i+1) = Atc(i) + (K23*Acc(i) - K32*Atc(i))*dt;

Aae(i+1) = Aae(i) - ka*Aae(i)*dt;

Ace(i+1) = Ace(i) + (ka*Aae(i) - (ke + K23)*Ace(i) + K32*Ate(i))*dt;

Ate(i+1) = Ate(i) + (K23*Ace(i) - K32*Ate(i))*dt;

end;

Cc=Acc/V2; %negative control

Ce=Ace/V2; %1% SDS-15 min

Ce

plot(t,Cc,t,Ce); % Plot Plasma conc vs t and Plasma conc vs t;

axis([0,300,0,10]);

grid;

xlabel('Time(min)');

ylabel('Amount');

**Matlab program used to estimate Ka for1%SDS-30 min recovery**

clear; % PK22.m

n = 300; % Number of steps

kao = 0.009; % ka in min-1

ke = 0.0245; % k in min-1

K23 = 0.0138; % K23 in min-1

K32 = 0.01; % K32 in min-1

dt = 300/n; % Let experiment run for 300 min and calculate dt from 300 min.

for i = 1:n % Initialize arrays;

t(i) = 0;

kaa(i) = 0;

Acc(i) = 0;

Atc(i) = 0;

Aac(i) = 0;

Ace(i) = 0;

Ate(i) = 0;

Aae(i) = 0;

end;

Fc = 0.015; % Bioavailability of control.

Fe = 0.019; % Bioavailability of experiment.

V2=25;

Aac(1) = Fc*6000; % Initial control amount at absorption site = 6000 mcg

Acc(1) = 0; % Initial control amount in central compartment = 0 mcg.

Atc(1) = 0; % Intial control amount in tissue compartment = 0 mcg.

Aae(1) = Fe*6000; % Initial experiment amount at absorption site = 6000 mcg

Ace(1) = 0; % Initial experiment amount in central compartment = 0 mcg.

Ate(1) = 0; % Intial experiment amount in tissue compartment = 0 mcg.

for i = 1:n-1; % Calculation of Aa (amount at absorption site) and A (amount in body)

t(i+1) = t(i) + dt;

if t(i+1) < 10;

ka = 0.020;

elseif t(i+1) >= 10 & t(i+1) < 20;

ka = .018;

elseif t(i+1) >= 20 & t(i+1) < 30;

ka = .018;

elseif t(i+1) >= 30 & t(i+1) < 45;

ka = kao;

elseif t(i+1) >= 45 & t(i+1) < 60;

ka = kao;

elseif t(i+1) >= 60 & t(i+1) < 300;

ka = kao;

elseif t(i+1) >= 300;

ka = kao;

end;

Aac(i+1) = Aac(i) - kao*Aac(i)*dt;

Acc(i+1) = Acc(i) + (kao*Aac(i) - (ke + K23)*Acc(i) + K32*Atc(i))*dt;

Atc(i+1) = Atc(i) + (K23*Acc(i) - K32*Atc(i))*dt;

Aae(i+1) = Aae(i) - ka*Aae(i)*dt;

Ace(i+1) = Ace(i) + (ka*Aae(i) - (ke + K23)*Ace(i) + K32*Ate(i))*dt;

Ate(i+1) = Ate(i) + (K23*Ace(i) - K32*Ate(i))*dt;

end;

Cc=Acc/V2; %negative control

Ce=Ace/V2; %1%SDS-30 min

Ce

plot(t,Cc,t,Ce); % Plot Plasma conc vs t and Plasma conc vs t;

axis([0,300,0,10]);

grid;

xlabel('Time(min)');

ylabel('Amount');

**Matlab program used to estimate Ka for1%SDS-1 hr recovery**

clear; % PK22.m

n = 300; % Number of steps

kao = 0.009; % ka in min-1

ke = 0.0245; % k in min-1

K23 = 0.0138; % K23 in min-1

K32 = 0.01; % K32 in min-1

dt = 300/n; % Let experiment run for 300 min and calculate dt from 300 min.

for i = 1:n % Initialize arrays;

t(i) = 0;

kaa(i) = 0;

Acc(i) = 0;

Atc(i) = 0;

Aac(i) = 0;

Ace(i) = 0;

Ate(i) = 0;

Aae(i) = 0;

end;

Fc = 0.015; % Bioavailability of control.

Fe = 0.015; % Bioavailability of experiment.

V2=25;

Aac(1) = Fc*6000; % Initial control amount at absorption site = 6000 mcg

Acc(1) = 0; % Initial control amount in central compartment = 0 mcg.

Atc(1) = 0; % Intial control amount in tissue compartment = 0 mcg.

Aae(1) = Fe*6000; % Initial experiment amount at absorption site = 6000 mcg

Ace(1) = 0; % Initial experiment amount in central compartment = 0 mcg.

Ate(1) = 0; % Intial experiment amount in tissue compartment = 0 mcg.

for i = 1:n-1; % Calculation of Aa (amount at absorption site) and A (amount in body)

t(i+1) = t(i) + dt;

if t(i+1) < 10;

ka = kao;

elseif t(i+1) >= 10 & t(i+1) < 20;

ka = kao;

elseif t(i+1) >= 20 & t(i+1) < 30;

ka = kao;

elseif t(i+1) >= 30 & t(i+1) < 45;

ka = kao;

elseif t(i+1) >= 45 & t(i+1) < 60;

ka = kao;

elseif t(i+1) >= 60 & t(i+1) < 300;

ka = kao;

elseif t(i+1) >= 300;

ka = kao;

end;

Aac(i+1) = Aac(i) - kao*Aac(i)*dt;

Acc(i+1) = Acc(i) + (kao*Aac(i) - (ke + K23)*Acc(i) + K32*Atc(i))*dt;

Atc(i+1) = Atc(i) + (K23*Acc(i) - K32*Atc(i))*dt;

Aae(i+1) = Aae(i) - ka*Aae(i)*dt;

Ace(i+1) = Ace(i) + (ka*Aae(i) - (ke + K23)*Ace(i) + K32*Ate(i))*dt;

Ate(i+1) = Ate(i) + (K23*Ace(i) - K32*Ate(i))*dt;

end;

Cc=Acc/V2; %negative control

Ce=Ace/V2; %1%SDS-60 min

Ce

plot(t,Cc,t,Ce); % Plot Plasma conc vs t and Plasma conc vs t;

axis([0,300,0,10]);

grid;

xlabel('Time(min)');

ylabel('Amount');

**Matlab program used to estimate Ka for1%SDS-3 hr recovery**

clear; % PK22.m

n = 300; % Number of steps

kao = 0.009; % ka in min-1

ke = 0.0245; % k in min-1

K23 = 0.0138; % K23 in min-1

K32 = 0.01; % K32 in min-1

dt = 300/n; % Let experiment run for 300 min and calculate dt from 300 min.

for i = 1:n % Initialize arrays;

t(i) = 0;

kaa(i) = 0;

Acc(i) = 0;

Atc(i) = 0;

Aac(i) = 0;

Ace(i) = 0;

Ate(i) = 0;

Aae(i) = 0;

end;

Fc = 0.015; % Bioavailability of control.

Fe = 0.0165; % Bioavailability of experiment.

V2=25;

Aac(1) = Fc*6000; % Initial control amount at absorption site = 6000 mcg

Acc(1) = 0; % Initial control amount in central compartment = 0 mcg.

Atc(1) = 0; % Intial control amount in tissue compartment = 0 mcg.

Aae(1) = Fe*6000; % Initial experiment amount at absorption site = 6000 mcg

Ace(1) = 0; % Initial experiment amount in central compartment = 0 mcg.

Ate(1) = 0; % Intial experiment amount in tissue compartment = 0 mcg.

for i = 1:n-1; % Calculation of Aa (amount at absorption site) and A (amount in body)

t(i+1) = t(i) + dt;

if t(i+1) < 10;

ka = kao;

elseif t(i+1) >= 10 & t(i+1) < 20;

ka = kao;

elseif t(i+1) >= 20 & t(i+1) < 30;

ka = kao;

elseif t(i+1) >= 30 & t(i+1) < 45;

ka = kao;

elseif t(i+1) >= 45 & t(i+1) < 60;

ka = kao;

elseif t(i+1) >= 60 & t(i+1) < 300;

ka = kao;

elseif t(i+1) >= 300;

ka = kao;

end;

Aac(i+1) = Aac(i) - kao*Aac(i)*dt;

Acc(i+1) = Acc(i) + (kao*Aac(i) - (ke + K23)*Acc(i) + K32*Atc(i))*dt;

Atc(i+1) = Atc(i) + (K23*Acc(i) - K32*Atc(i))*dt;

Aae(i+1) = Aae(i) - ka*Aae(i)*dt;

Ace(i+1) = Ace(i) + (ka*Aae(i) - (ke + K23)*Ace(i) + K32*Ate(i))*dt;

Ate(i+1) = Ate(i) + (K23*Ace(i) - K32*Ate(i))*dt;

end;

Cc=Acc/V2; %negative control

Ce=Ace/V2; %1%SDS-180 min

Ce

plot(t,Cc,t,Ce); % Plot Plasma conc vs t and Plasma conc vs t;

axis([0,300,0,10]);

grid;

xlabel('Time(min)');

ylabel('Amount');

**Matlab program used to estimate Ka for1.5%SDS-3 hr recovery**

clear; % PK22.m

n = 300; % Number of steps

kao = 0.009; % ka in min-1

ke = 0.0245; % k in min-1

K23 = 0.0138; % K23 in min-1

K32 = 0.01; % K32 in min-1

dt = 300/n; % Let experiment run for 300 min and calculate dt from 300 min.

for i = 1:n % Initialize arrays;

t(i) = 0;

kaa(i) = 0;

Acc(i) = 0;

Atc(i) = 0;

Aac(i) = 0;

Ace(i) = 0;

Ate(i) = 0;

Aae(i) = 0;

end;

Fc = 0.015; % Bioavailability of control.

Fe = 0.0171; % Bioavailability of experiment.

V2=25;

Aac(1) = Fc*6000; % Initial control amount at absorption site = 6000 mcg

Acc(1) = 0; % Initial control amount in central compartment = 0 mcg.

Atc(1) = 0; % Intial control amount in tissue compartment = 0 mcg.

Aae(1) = Fe*6000; % Initial experiment amount at absorption site = 6000 mcg

Ace(1) = 0; % Initial experiment amount in central compartment = 0 mcg.

Ate(1) = 0; % Intial experiment amount in tissue compartment = 0 mcg.

for i = 1:n-1; % Calculation of Aa (amount at absorption site) and A (amount in body)

t(i+1) = t(i) + dt;

if t(i+1) < 10;

ka = kao;

elseif t(i+1) >= 10 & t(i+1) < 20;

ka = kao;

elseif t(i+1) >= 20 & t(i+1) < 30;

ka = kao;

elseif t(i+1) >= 30 & t(i+1) < 45;

ka = kao;

elseif t(i+1) >= 45 & t(i+1) < 60;

ka = kao;

elseif t(i+1) >= 60 & t(i+1) < 300;

ka = kao;

elseif t(i+1) >= 300;

ka = kao;

end;

Aac(i+1) = Aac(i) - kao*Aac(i)*dt;

Acc(i+1) = Acc(i) + (kao*Aac(i) - (ke + K23)*Acc(i) + K32*Atc(i))*dt;

Atc(i+1) = Atc(i) + (K23*Acc(i) - K32*Atc(i))*dt;

Aae(i+1) = Aae(i) - ka*Aae(i)*dt;

Ace(i+1) = Ace(i) + (ka*Aae(i) - (ke + K23)*Ace(i) + K32*Ate(i))*dt;

Ate(i+1) = Ate(i) + (K23*Ace(i) - K32*Ate(i))*dt;

end;

Cc=Acc/V2; %negative control

Ce=Ace/V2; %1.5%SDS-180 min

Ce

plot(t,Cc,t,Ce); % Plot Plasma conc vs t and Plasma conc vs t;

axis([0,300,0,10]);

grid;

xlabel('Time(min)');

ylabel('Amount');

**Matlab program used to estimate Ka for 2%SDS-3 hr recovery**

clear; % PK22.m

n = 300; % Number of steps

kao = 0.009; % ka in min-1

ke = 0.0245; % k in min-1

K23 = 0.0138; % K23 in min-1

K32 = 0.01; % K32 in min-1

dt = 300/n; % Let experiment run for 300 min and calculate dt from 300 min.

for i = 1:n % Initialize arrays;

t(i) = 0;

kaa(i) = 0;

Acc(i) = 0;

Atc(i) = 0;

Aac(i) = 0;

Ace(i) = 0;

Ate(i) = 0;

Aae(i) = 0;

end;

Fc = 0.015; % Bioavailability of control.

Fe = 0.023; % Bioavailability of experiment.

V2=25;

Aac(1) = Fc*6000; % Initial control amount at absorption site = 6000 mcg

Acc(1) = 0; % Initial control amount in central compartment = 0 mcg.

Atc(1) = 0; % Intial control amount in tissue compartment = 0 mcg.

Aae(1) = Fe*6000; % Initial experiment amount at absorption site = 6000 mcg

Ace(1) = 0; % Initial experiment amount in central compartment = 0 mcg.

Ate(1) = 0; % Intial experiment amount in tissue compartment = 0 mcg.

for i = 1:n-1; % Calculation of Aa (amount at absorption site) and A (amount in body)

t(i+1) = t(i) + dt;

if t(i+1) < 10;

ka = 0.0122;

elseif t(i+1) >= 10 & t(i+1) < 30;

ka = .014;

elseif t(i+1) >= 30 & t(i+1) < 60;

ka = 0.011;

elseif t(i+1) >= 60 & t(i+1) < 300;

ka = kao;

elseif t(i+1) >= 300;

ka = kao;

end;

Aac(i+1) = Aac(i) - kao*Aac(i)*dt;

Acc(i+1) = Acc(i) + (kao*Aac(i) - (ke + K23)*Acc(i) + K32*Atc(i))*dt;

Atc(i+1) = Atc(i) + (K23*Acc(i) - K32*Atc(i))*dt;

Aae(i+1) = Aae(i) - ka*Aae(i)*dt;

Ace(i+1) = Ace(i) + (ka*Aae(i) - (ke + K23)*Ace(i) + K32*Ate(i))*dt;

Ate(i+1) = Ate(i) + (K23*Ace(i) - K32*Ate(i))*dt;

end;

Cc=Acc/V2; %negative control

Ce=Ace/V2; %2%SDS-180 min

Ce

plot(t,Cc,t,Ce); % Plot Plasma conc vs t and Plasma conc vs t;

axis([0,300,0,10]);

grid;

xlabel('Time(min)');

ylabel('Amount');
